# Supplementary material for: QSAR aided design and development of biopolymer-based SPE phase for liquid chromatographic analysis of polycyclic aromatic hydrocarbons in environmental water samples
Source: Royal Society of Chemistry journal article supplement (doi:10.1039/c6ra10932b), 2016-01-01
Supplement: c6ra10932b1.pdf [file c6ra10932b1.pdf]

**Electronic Supplementary Information: QSAR aided design and development of biopolymer-based SPE phase for liquid chromatographic analysis of polycyclic aromatic hydrocarbons in environmental water samples**

**ESI 1. Data treatment for DFT computational study**

Quantum chemical descriptors such as ionization potential ( $I$ ), electron affinity ( $A$ ), and energy gap ( $\Delta E$ ) were respectively calculated according to equations 3.1 – 3.7

$$I = -E_{HOMO} \quad 1$$

$$A = -E_{LUMO} \quad 2$$

$$\Delta E = E_{HOMO} - E_{LUMO} \quad 3$$

where  $E_{LUMO}$  and  $E_{HOMO}$  are the energies of Lowest Unoccupied Molecular Orbitals and Highest Occupied Molecular Orbitals respectively, generated from the DFT calculations.

## **ESI 2. Evaluation of method performance and validation**

### **2.1 Method Detection Limit**

To evaluate the method detection limits, the official method of the US EPA <sup>22</sup> was applied.

Method detection limit, MDL was calculated by the following expression:

$$MDL = t \times s \quad 1$$

where  $t$  is the Student's  $t$  value for a 99% confidence interval and a standard deviation estimate with  $n-1$  degrees of freedom, and  $s$  is the standard deviation of the replicate analyses.

For this study, six replicate analysis of laboratory tap water samples (isotope preparatory lab of centre for environmental remediation, IGSNRR, Beijing) were done. The spike level for the tap water was 0.5 for fluorescence detector, and 1.0 and 10  $\mu\text{g/L}$  for UV detector.

### **2.2 Precision**

The precision was measured as the relative standard deviations (RSD) of the data obtained from the experiment for method detection limit. RSD was calculated using the following expression:

$$RSD = \frac{s}{\bar{x}} \times \frac{100}{1} \quad 2$$

where  $s$  is the standard deviation, and  $\bar{x}$  is the mean value of the six replicate measurements.

### **2.3 Linearity and Linear range of the method**

For this study, the water samples containing 0.5, 5.0, 25.0, and 50.0  $\mu\text{g/L}$  of US EPA PAH mix were prepared, preconcentrated and analyzed. The peak response (peak area) was plotted

against the corresponding concentration value. The linearity was assessed as  $r^2$  values of the straight line plots.

## 2.4 Recovery study

The water samples used for the recovery studies were tap water collected from isotope preparatory lab of centre for environmental remediation, IGSNRR, Beijing, and polluted water samples collected from Shahe river (40°7'43.36"N, 116°19'9.43"E), Beijing. The recovery study was done by analyzing the un-spiked and spiked water samples, and the percentage recovery was calculated as follows:

$$\text{Recovery} = \frac{C_{SP} - C_{UP}}{SL} \times \frac{100\%}{1} \quad 3$$

where  $C_{SP}$  is the concentration of the spiked sample,  $C_{UP}$  is the concentration of the unspiked sample, and  $SL$  is the spike level.

For the recovery study, the spike level for both tap and Shahe river samples was 10 µg/L. The optimum values of the SPE parameters as determined from the optimization experiments were applied for the recovery study.

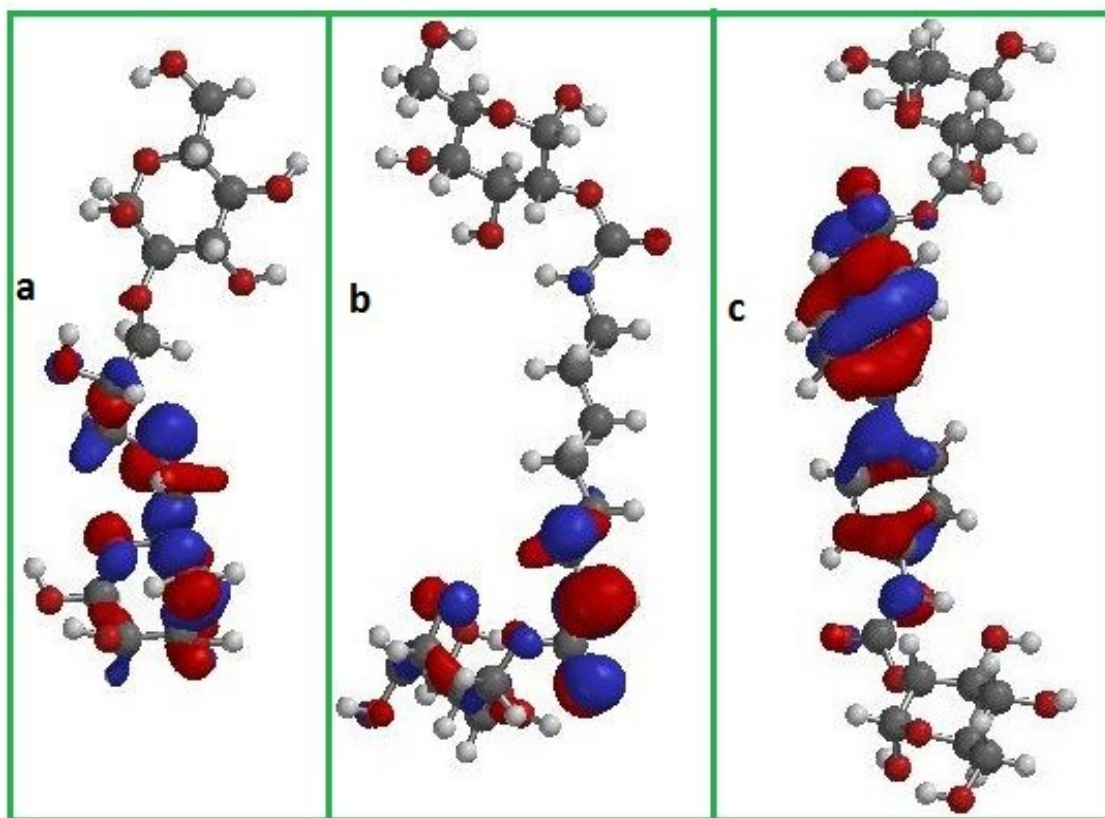

Figure S1: Highest occupied molecular orbital (HOMO) of (a) EPI biopolymer (b) HDI biopolymer and (c) MDI biopolymer<sup>12</sup>

**Table ESI. 1.** Excitation and emission wavelength for fluorescence detection

| Constituent PAHs       | Excitation wavelength | Emission wavelength |
|------------------------|-----------------------|---------------------|
| Naphthalene            | 224                   | 330                 |
| Acenaphthylene         | not detected          |                     |
| Acenaphthene           | 234                   | 320                 |
| Fluorene               | 224                   | 320                 |
| Phenanthrene           | 224                   | 320                 |
| Anthracene             | 250                   | 370                 |
| Fluoranthene           | 252                   | 402                 |
| Pyrene                 | 238                   | 398                 |
| Benzo (a) anthracene   | 238                   | 398                 |
| Chrysene               | 238                   | 398                 |
| Benzo(b)fluoranthene   | 268                   | 398                 |
| Benzo(k)fluoranthene   | 268                   | 398                 |
| Benzo(a)pyrene         | 268                   | 398                 |
| Dibenzo(a,h)anthracene | 234                   | 420                 |
| Benzo(g,h,i)perylene   | 234                   | 420                 |
| Indeno(1,2,3-cd)pyrene | 300                   | 466                 |
